# Supplementary material for: Genome-dependent chromosome dynamics in three successive generations of the allotetraploid Festuca pratensis × Lolium perenne hybrid
Source: PubMed Central journal article supplement (PMC4491343; doi:10.1007/s00709-014-0734-9), 2014-12-06
Supplement: 709_2014_734_MOESM2_ESM.pdf [file 709_2014_734_MOESM2_ESM.pdf]

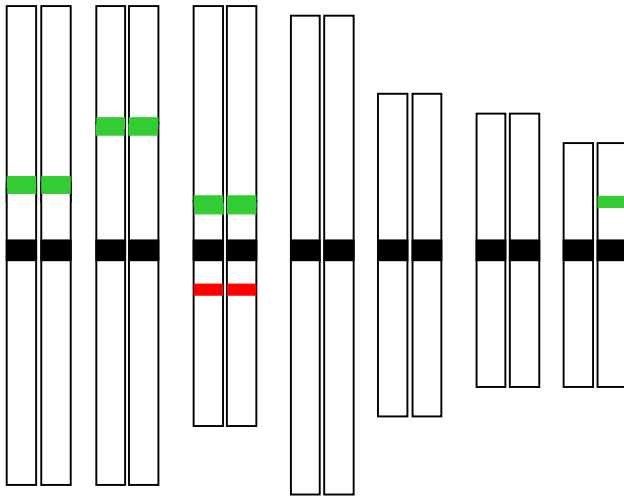

A. *L. perenne* (4x)

**5S rDNA:** 2 loci  
**35S rDNA:** 7 loci

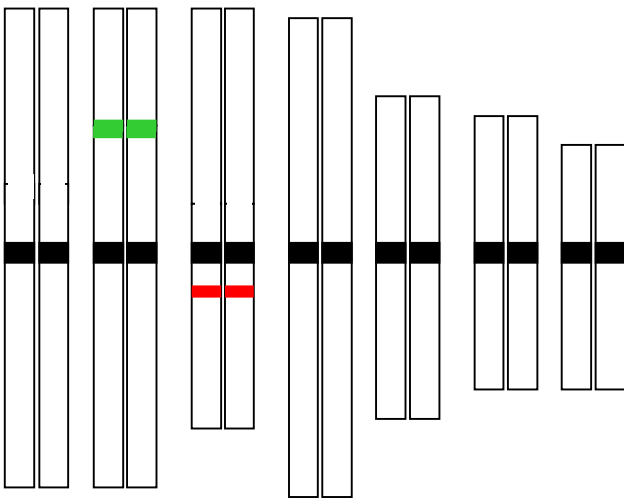

B. *F. pratensis* (4x)

**5S rDNA:** 2 loci  
**35S rDNA:** 2 loci

C. *F. pratensis* (4x) × *L. perenne* (4x) hybrid.

**5S rDNA:** 4 loci  
**35S rDNA:** 9 loci

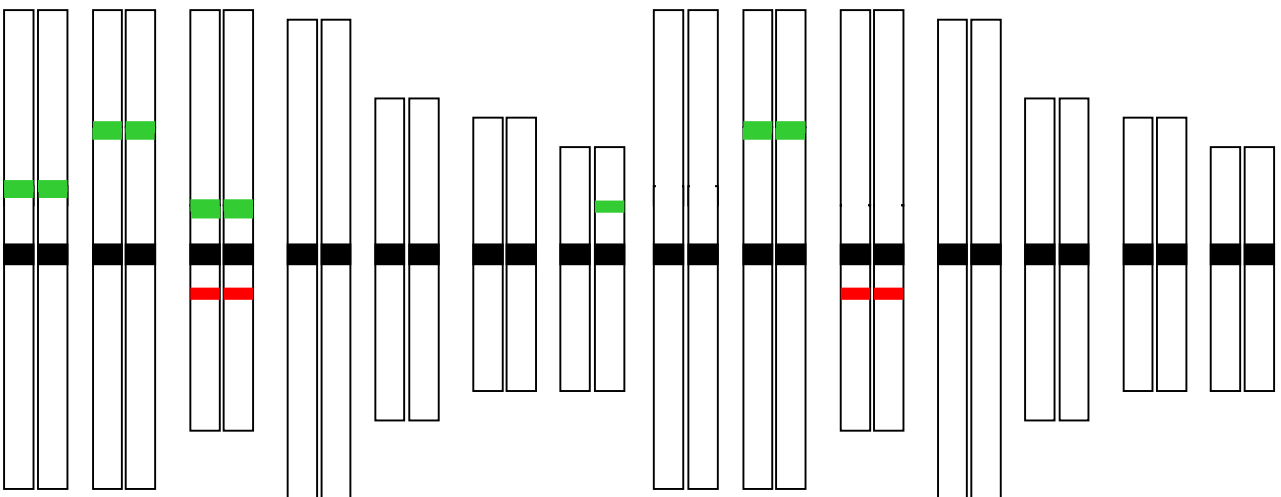

Fig. S1.
