# Supplementary material for: Genome-dependent chromosome dynamics in three successive generations of the allotetraploid Festuca pratensis × Lolium perenne hybrid
Source: PubMed Central journal article supplement (PMC4491343; doi:10.1007/s00709-014-0734-9), 2014-12-06
Supplement: 709_2014_734_MOESM3_ESM.pdf [file 709_2014_734_MOESM3_ESM.pdf]

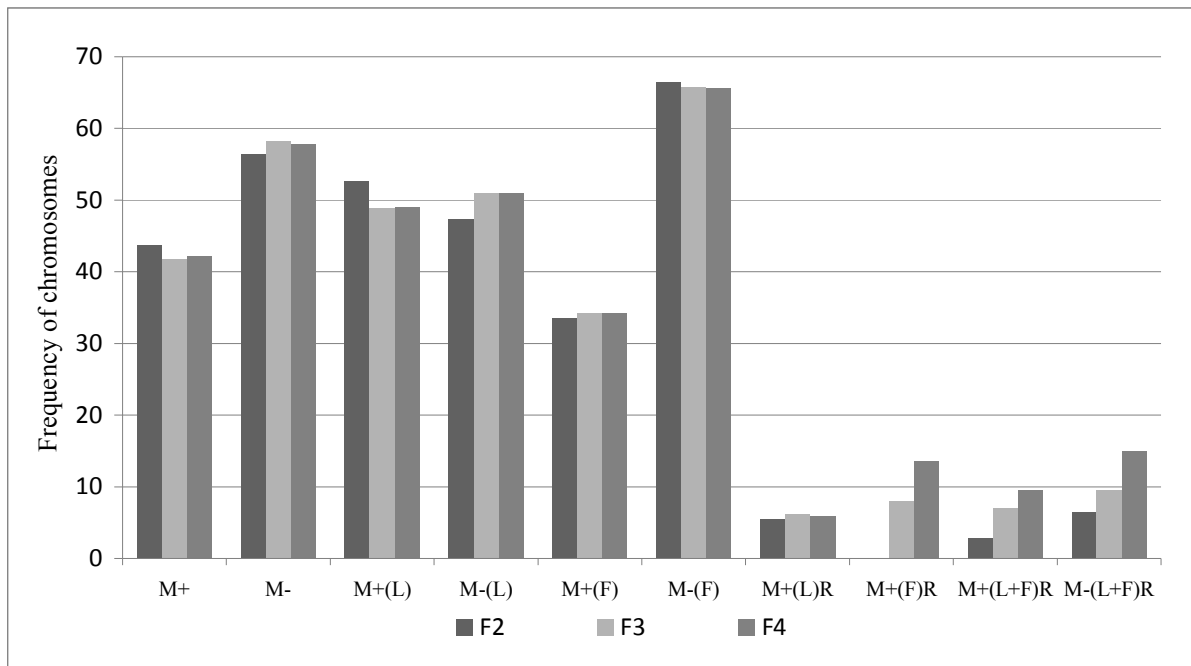

Fig. S2.
